# Supplementary material
Source: bioRxiv or medRxiv preprint supplement (https://medrxiv.org/highwire/filestream/79484/field_highwire_adjunct_files/0/2020.05.02.20088575-1.pdf)
Supplement: Supplementary file [file 2020.05.02.20088575-1.pdf]

## Supplementary Information

Mohammad Eftekhari, Yasin Panahi, Fahimeh Salasar Moghaddam, Mohammad Reza Eskandari, Hamid Pezeshk, and Mehrdad Pedram\*

### Differential Levels of Telomeric Oxidized Bases and TERRA Transcripts in Childhood Autism

\*Corresponding Author: Mehrdad Pedram, Ph.D.

Dept. of Genetics and Molecular Medicine, School of Medicine, Zanzan University of Medical Sciences, Mahdavi Blvd., Shahrak Karmandan, Zanzan 45139-56111, IRAN.

Tel/Fax: +98 (24) 3344 9553.

E-mail: [mehrdad.pedram@gmail.com](mailto:mehrdad.pedram@gmail.com) or [mpedram@zums.ac.ir](mailto:mpedram@zums.ac.ir).

#### Contents of this supplement:

- **Legends to Supplementary Figures**
- **Table S1:** Sequences of synthesized oligomers used as templates to construct 8-oxo-dG standard calibration curve.
- **Figure S1:** FPG-sensitive site standard curve.
- **Figure S2:** Correlation between ADI-R total scores and telomeric oxidized bases among autistic subjects.
- **Figure S3:** Expression stability analysis of the candidate reference genes in the saliva samples from female subjects.
- **Corresponding References** (indicated in the Figure Legend and Text in brackets)

#### Legends to Supplementary Figures:

**Supplementary Figure S1. FPG-sensitive site standard curve.** Double stranded oligomers containing different (0-4) 8-oxo-dG residues were digested with FPG enzyme, and qPCR reactions were performed on cut and uncut templates. Values for  $\Delta C_q$  ( $C_q$  cut –  $C_q$  uncut) different templates were calculated and used for drawing the standard curve based on the numbers of 8-oxo-dG per kb telomere sequence ( $y = 0.08 X + 0.423$ ).

**Supplementary Figure S2. Correlation between ADI-R total scores and telomeric oxidized bases among autistic subjects.** Correlation between ADI-R total scores and telomeric oxidized/FPG-sensitive sites are shown for: (A) autistic children irrespective of gender (squares); (B) autistic male children (triangles); (C) autistic female children (circles); and (D) verbal and (E) nonverbal autistic children. In all plots except for panel a, closed and open symbols represent verbal and nonverbal subjects, respectively. Spearman's correlation coefficient ( $r_s$ ) values and  $P$ -values are noted for each graph.

**Supplementary Figure S3. Expression stability analysis of the candidate reference genes in the saliva samples from female subjects.** In phase I (A-C), the stability of expression for eight candidate genes were tested in four female saliva samples (two with childhood autism and two healthy controls) by geNorm (A) and NormFinder (B) algorithms [2, 3]. The genes examined are ranked (left to right) from the least stable to the most. In phase II (D-F), four genes were taken for further analysis in a total of 13 female saliva samples (seven with childhood autism and six healthy controls). With the inclusion of the clinical group's identifier in the NormFinder analysis, *GAPDH* and *YWHAZ* were ranked as the best stable genes, in agreement with the geNorm ranking. However, based on the pairwise variation (V) analysis by geNorm, neither of the gene combinations were good enough as they all fell above the cut-off point of 0.15 (C and F).

**Table S1:** Sequences of synthesized oligomers used as templates to construct the 8-oxo-dG standard calibration curve.

| Oligomer's Name | No. of 8-oxo-dG sites | FPG-sensitive Sites per kb telomere | 84-mer Oligo Sequence                                                                     |
|-----------------|-----------------------|-------------------------------------|-------------------------------------------------------------------------------------------|
| Tel 0           | 0                     | 0.0                                 | 5'-TTAGGG TTAGGG TTAGGG-3' |
| Tel 1           | 1                     | 11.9                                | 5'-TTAGGG TTAGGG TTAGGG-3' |
| Tel 2           | 2                     | 23.8                                | 5'-TTAGGG TTAGGG TTAGGG-3' |
| Tel 4           | 4                     | 47.6                                | 5'-TTAGGG TTAGGG TTAGGG-3' |
| Reverse         | 0                     | 0.0                                 | 5'-CCCTAA CCCTAA CCCTAA CCCTAA CCCTAA CCCTAA CCCTAA CCCTAA CCCTAA CCCTAA CCCTAA-3'        |

**Note:** Highlighted "X" letters in the oligo sequences show the positions of the replaced guanine base with the oxidized base, 8-oxo-dG. Adapted from Nathan O'Callaghan and colleagues [1].

**Figure S1**

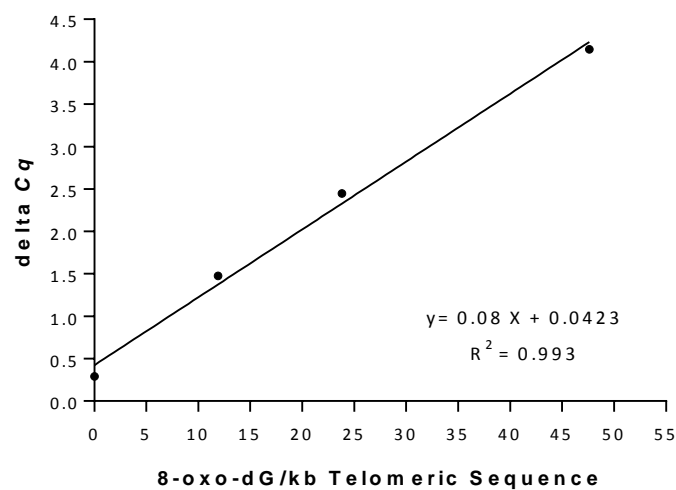

Figure S2

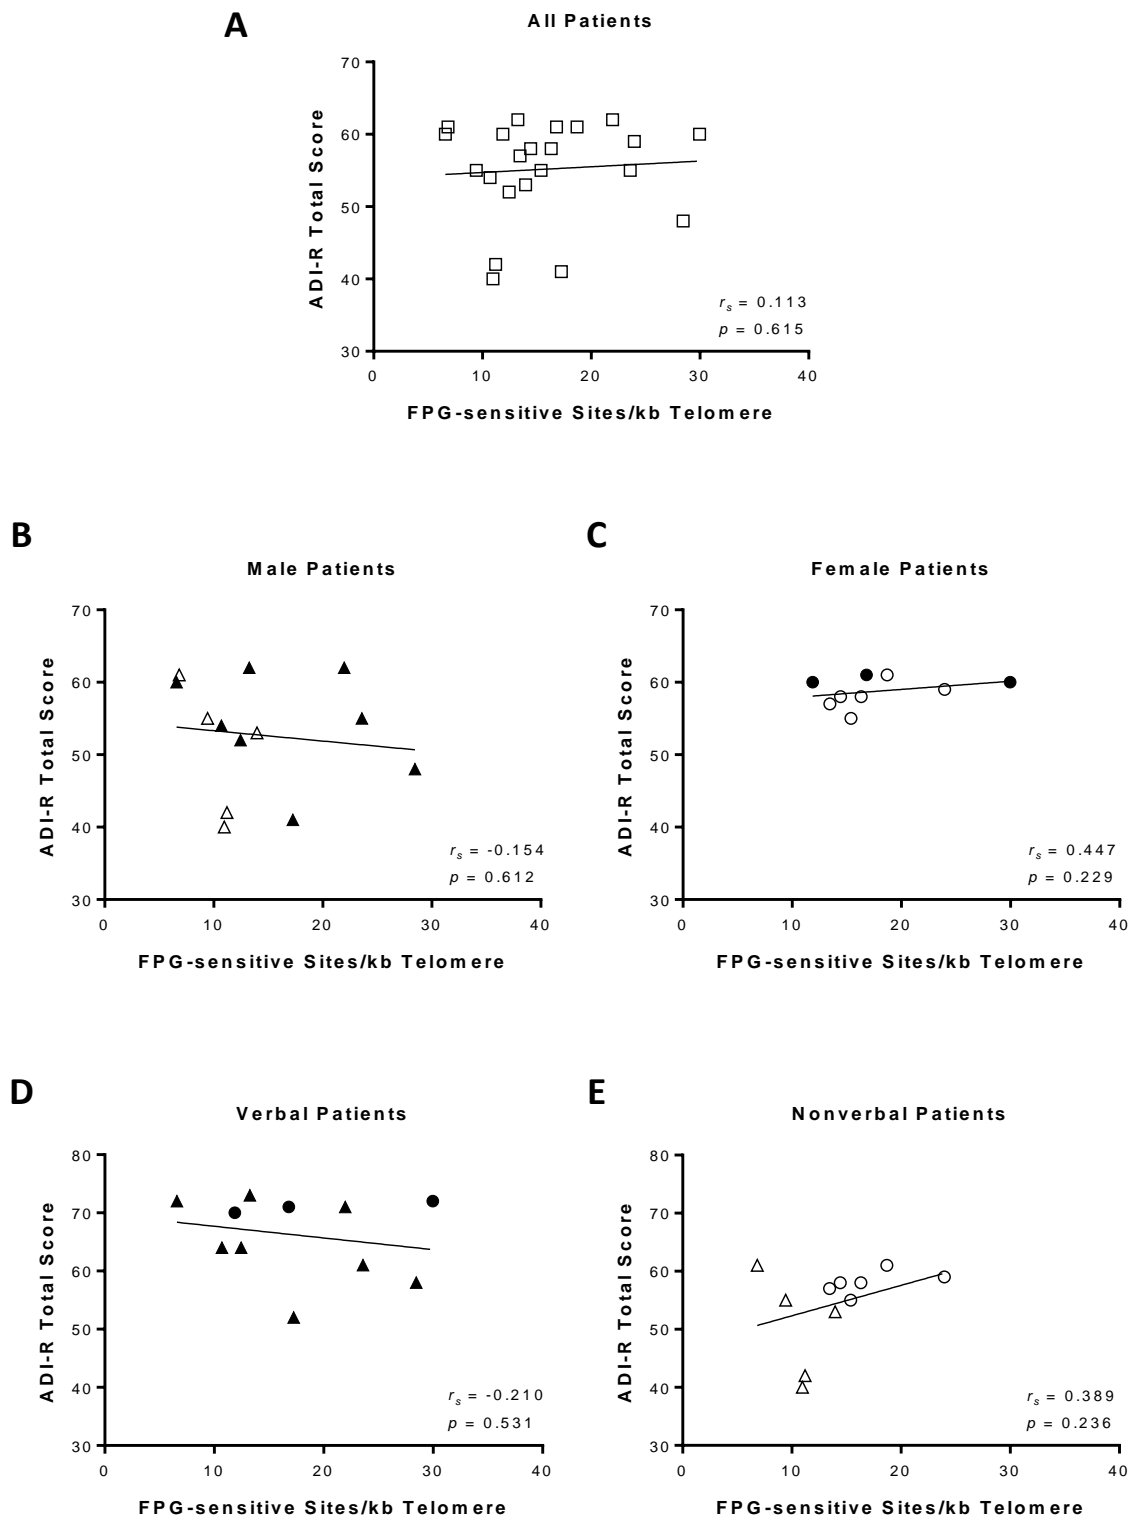

Figure S3

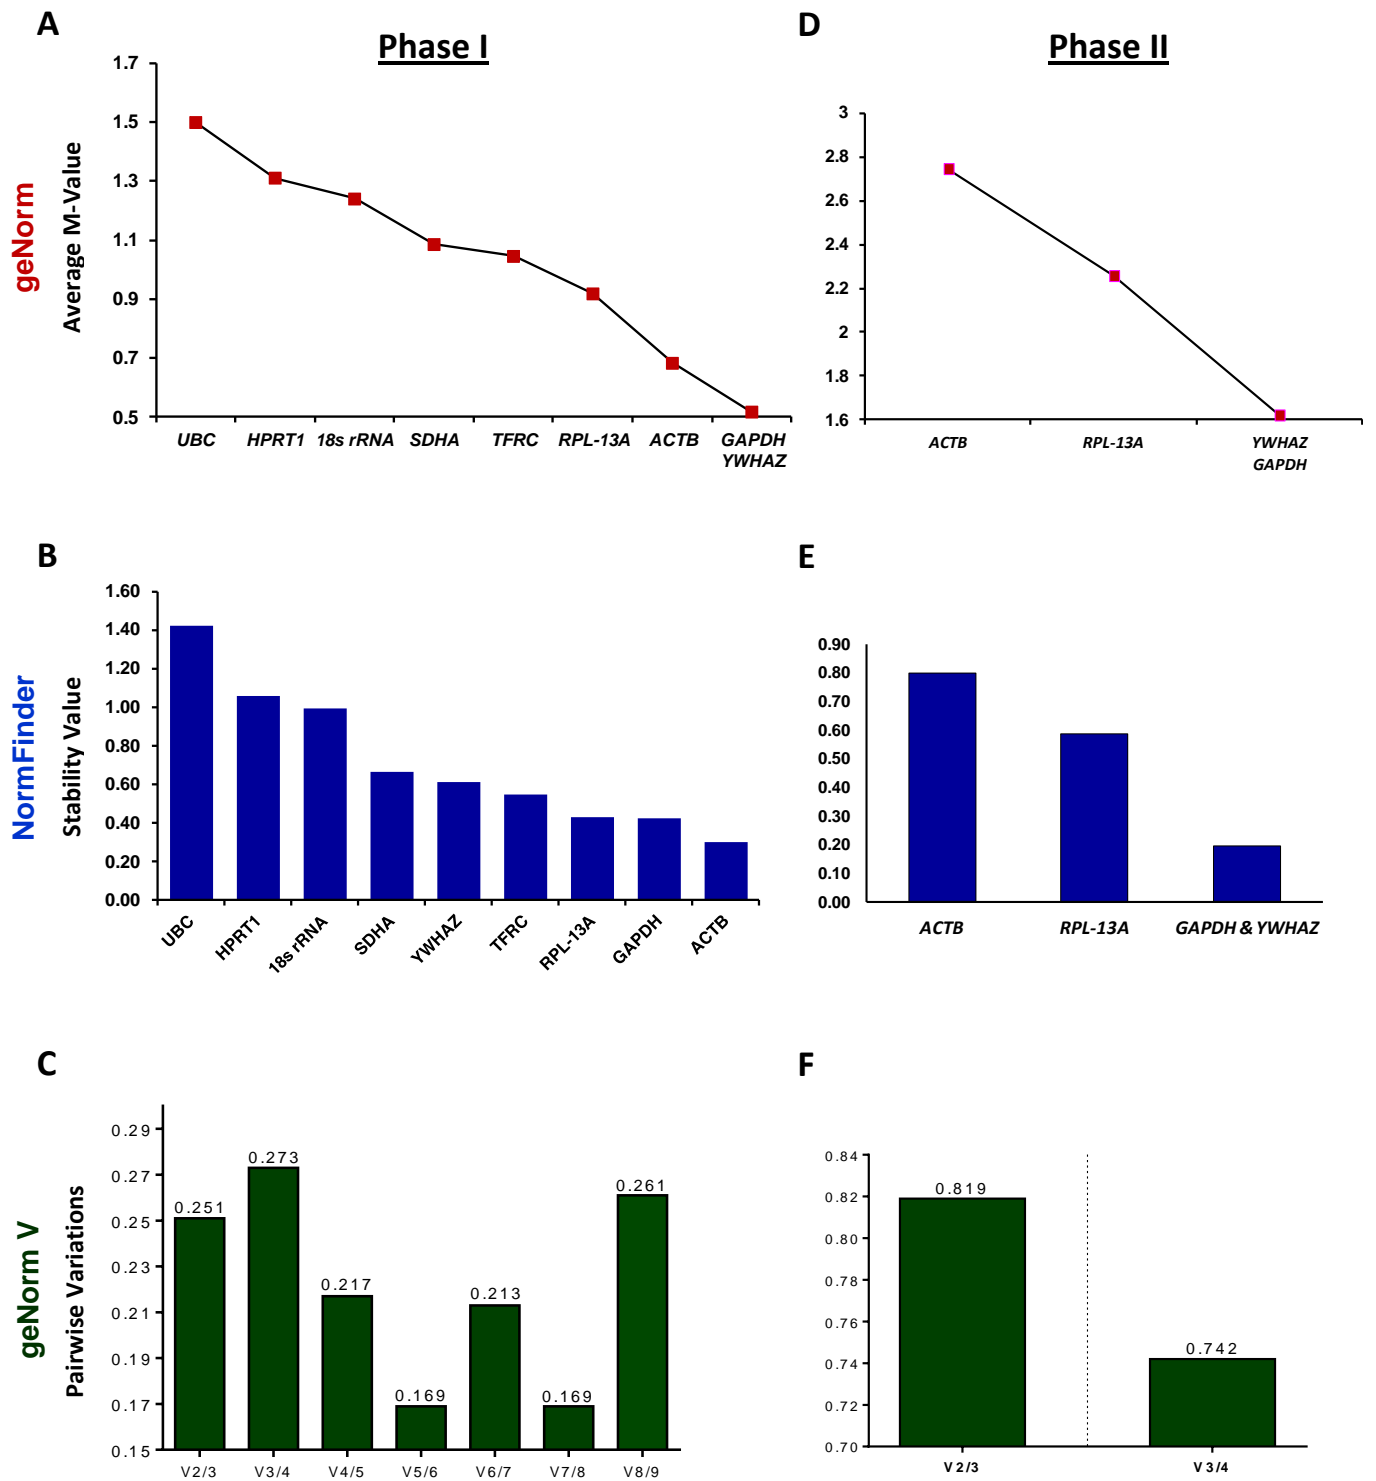

## References:

1. O'Callaghan N, Baack N, Sharif R, Fenech M. A qPCR-based assay to quantify oxidized guanine and other FPG-sensitive base lesions within telomeric DNA. *Biotechniques* 2011; **51**(6): 403-411.
2. Vandesompele J, De Preter K, Pattyn F, Poppe B, Van Roy N, De Paepe A, Speleman F. Accurate normalization of real-time quantitative RT-PCR data by geometric averaging of multiple internal control genes. *Genome Biol* 2002; **3**(7):RESEARCH0034.
3. Andersen CL, Jensen JL, Orntoft TF. Normalization of real-time quantitative reverse transcription-pcr data: A model-based variance estimation approach to identify genes suited for normalization, applied to bladder and colon cancer data sets. *Cancer Res* 2004; **64**(15): 5245-5250.
